# Supplementary material
Source: Springer Nature journal article supplement (https://www.springermedizin.de/resource/supplementary/13046_2010_444_MOESM3_ESM.pdf/9662246)

Saline

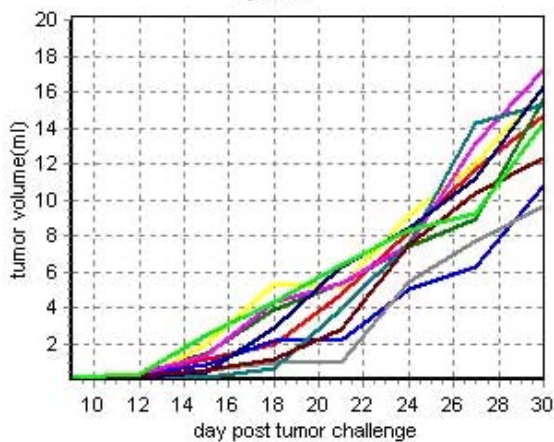

mHSPs/P

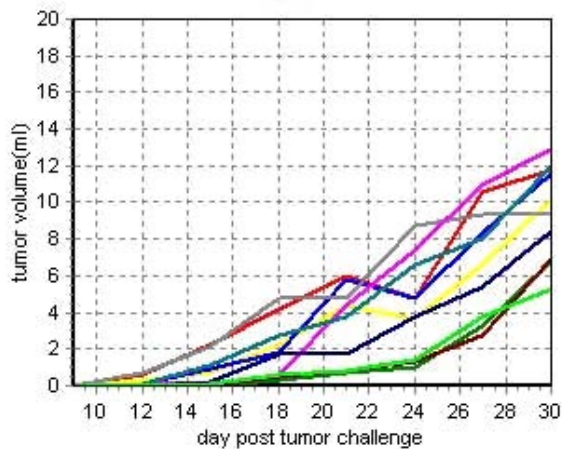

Cy+IL-12

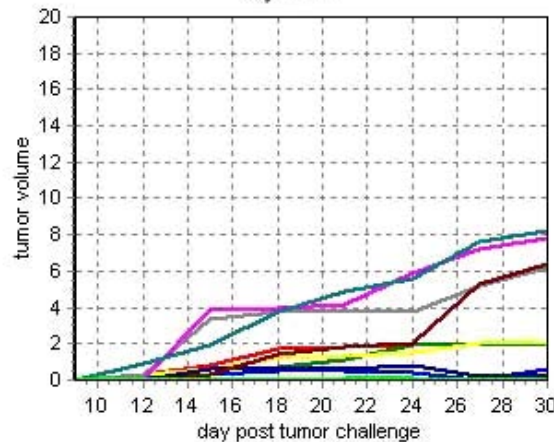

mHSPs/P+IL-12

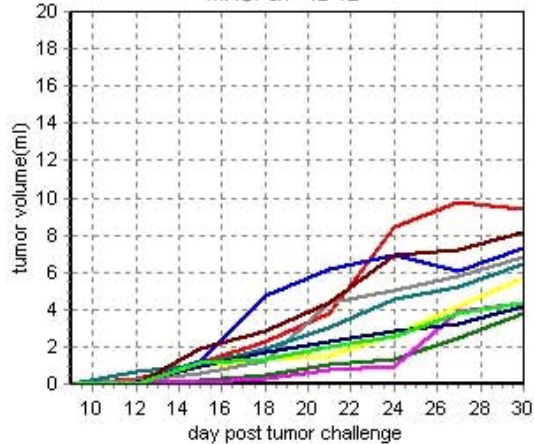

mHSPs/P+Cy+IL-12

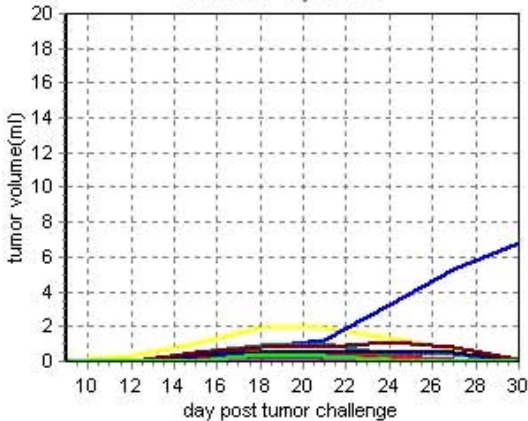

mHSPs/P+Cy

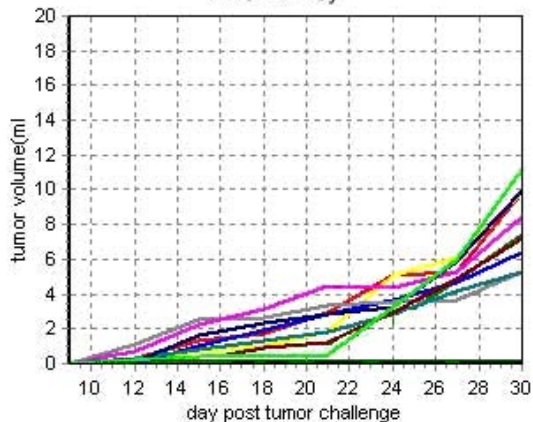

Supplement: MOESM3 [file 9662246]
